# Supplementary material for: Corrupción, contaminación y desigualdad social: figuración espacial y reproducción de la estructura social en un barrio del Conurbano Bonaerense
Source: Springer Nature journal article supplement (doi:10.1186/s12889-020-08894-0), 2009-01-01

# Trend in Medicare reimbursement rate on HHA, 2000–2014

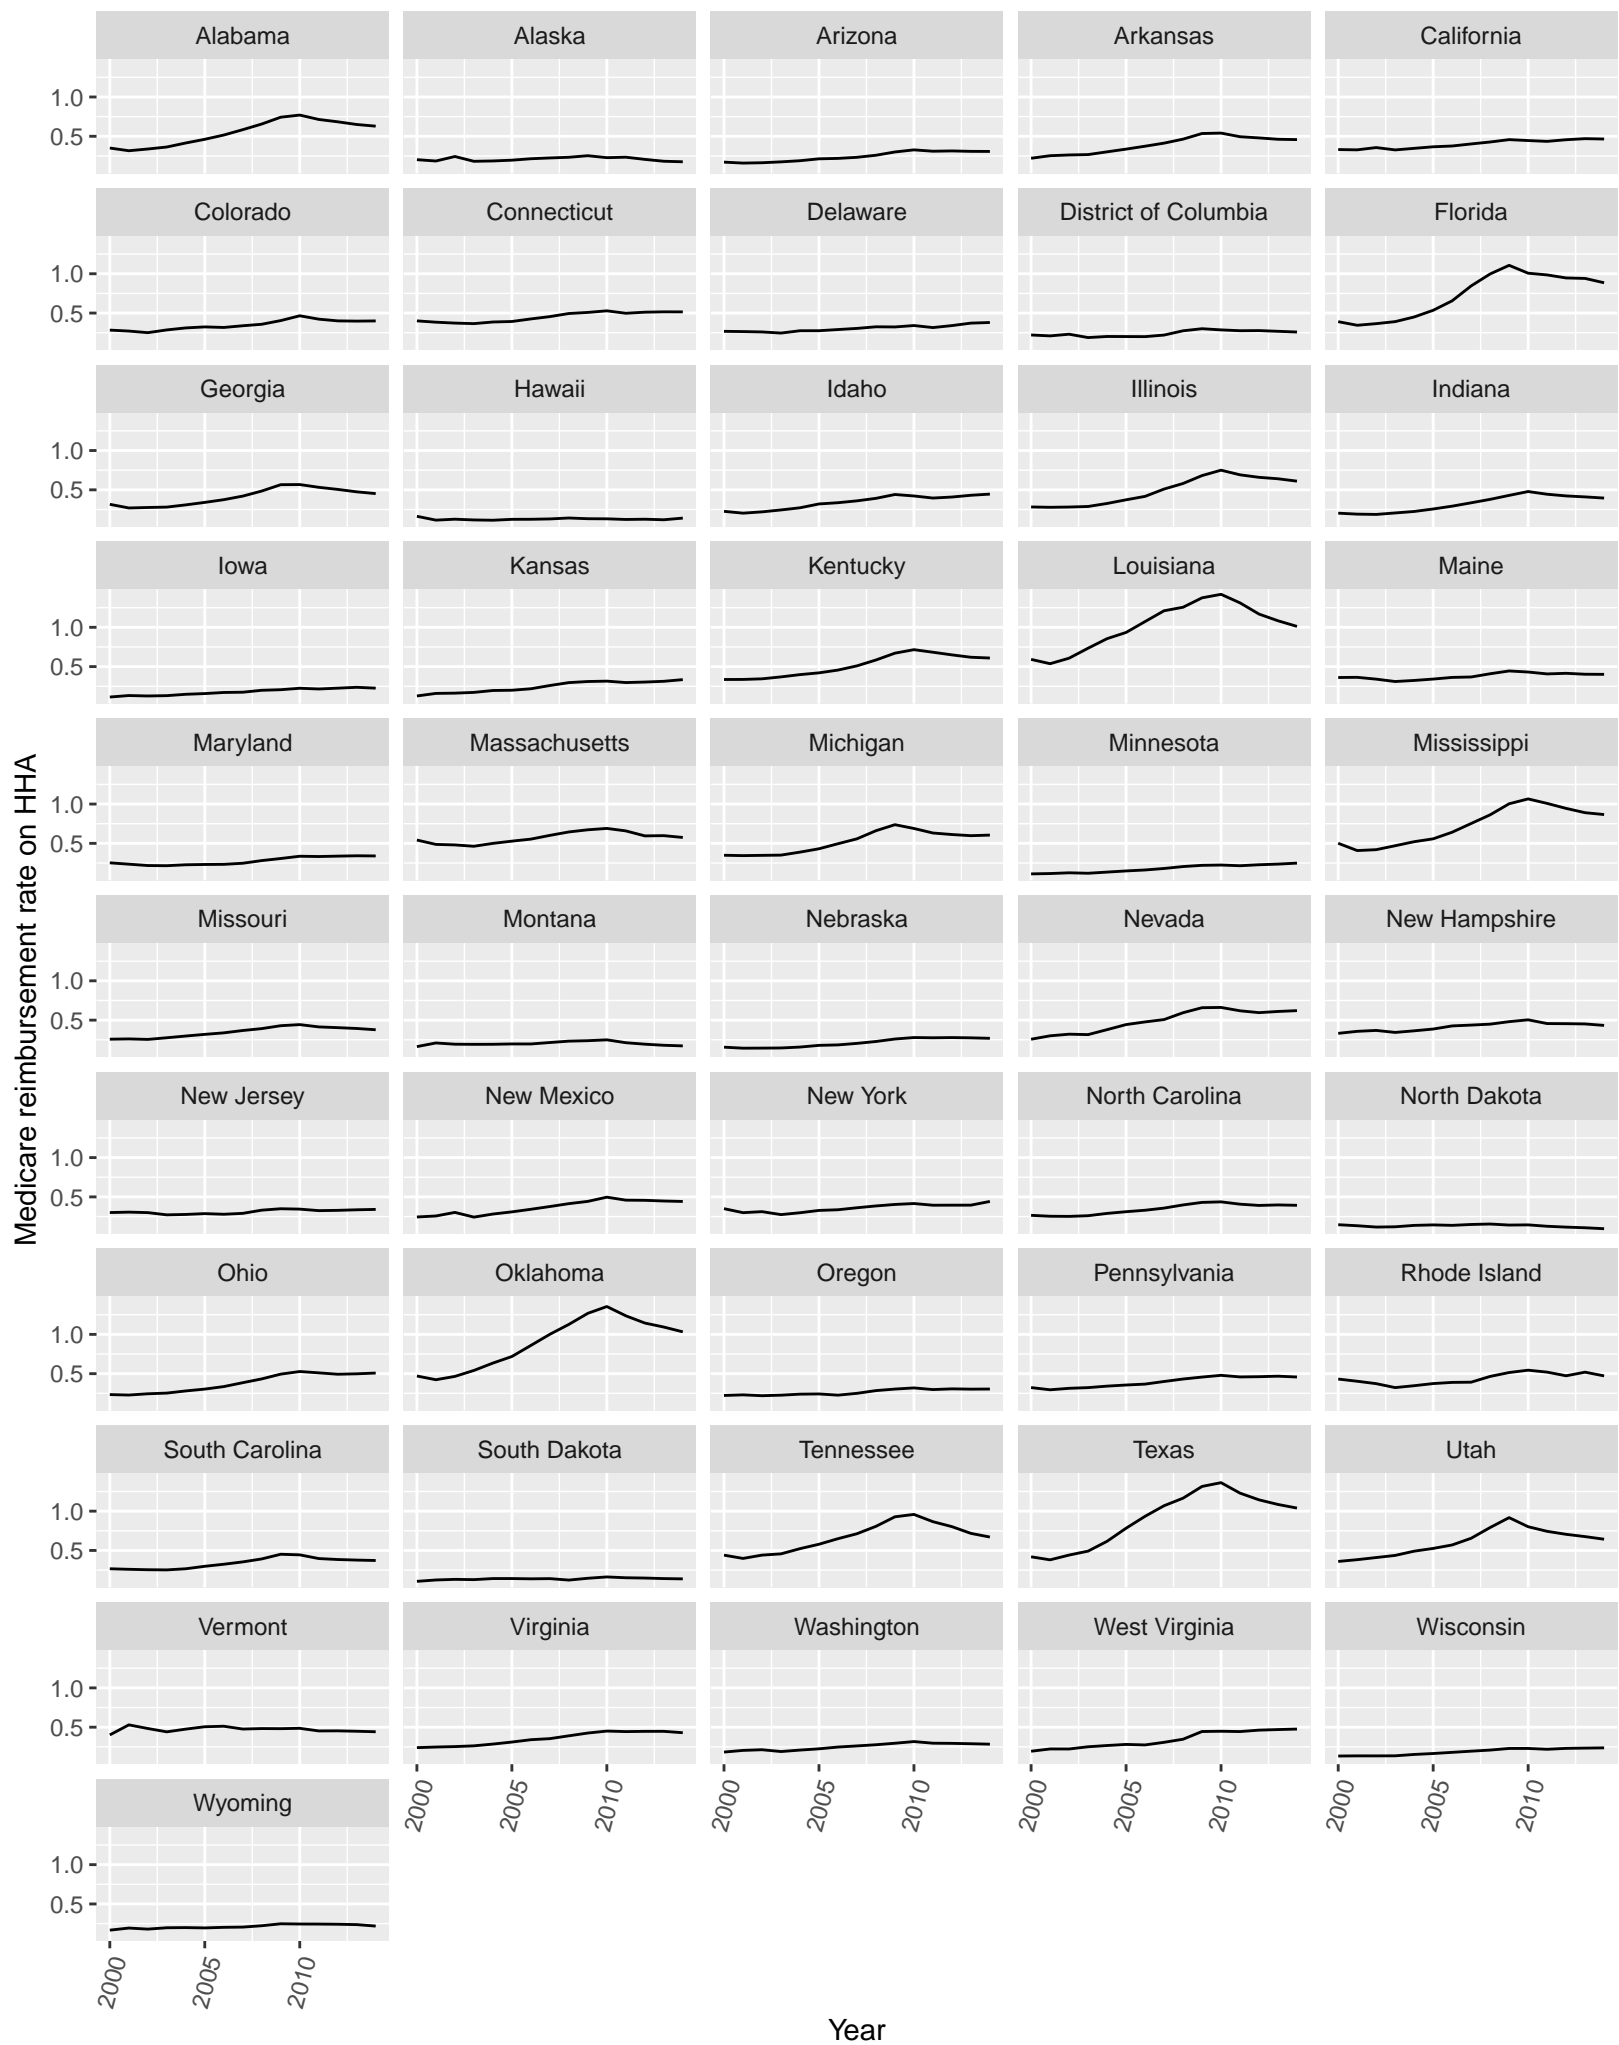

Supplement: MOESM7 [file 18070262]
